# Supplementary material for: Octacalcium phosphate microscopic superstructure self-assembly and evolution by dual-mediating combination
Source: Royal Society of Chemistry journal article supplement (doi:10.1039/b823210p), 2009-01-01
Supplement: b823210p.pdf [file b823210p.pdf]

## Supporting Information

### Octacalcium phosphate microscopic superstructure self-assembly and evolution by dual-mediating combination

Zhongru Gou<sup>a\*</sup>, Xianyan Yang<sup>a</sup>, Xin Gao<sup>a</sup>, Xinli Zhang<sup>b</sup>, Kang Ting<sup>b</sup>, Benjamin Wu<sup>c</sup> and Changyou Gao<sup>a</sup>

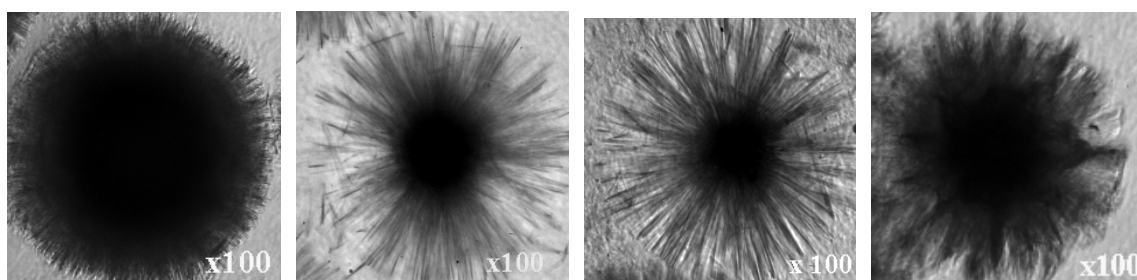

**Figure S1.** Growth patterns of OCP nanocrystal individuals along the core in the aqueous solution by PASP/CTAB dual-mediating combination (from left to right: No. 6, No. 7, No. 8 and No. 9. The optical images confirm a relatively slow process of intergrowth from a core enabling the structure evolution with increasing  $R$  value, and further the elongated one-dimensional nanoplates have been aligned toward the center of dandelion-like sphere.

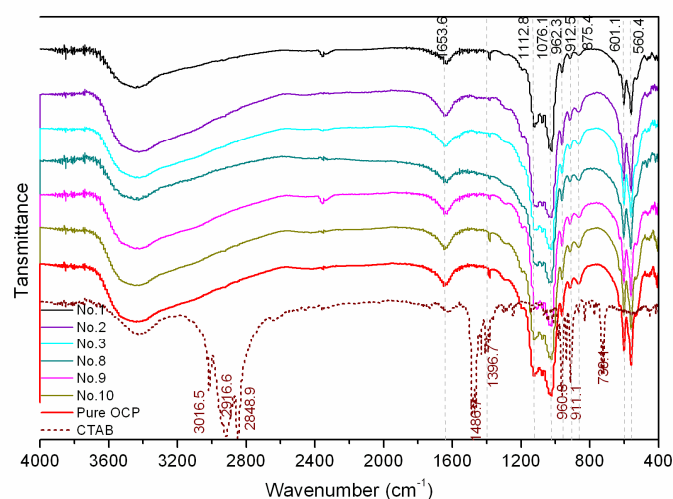

**Figure S2.** FTIR spectra of OCP samples synthesized from a dual-mediating approach in the aqueous solution with different  $R$  values, in contrast with the pure OCP and CTAB. The spectra exhibited a bending mode of  $\text{H}_2\text{O}$  at  $1653\text{cm}^{-1}$ . The adsorption band at  $1076\text{ cm}^{-1}$  can be assigned to the stretching mode of the P–O bond. The shoulders at  $960\text{--}964$  and  $1090\text{--}1120\text{ cm}^{-1}$  can be attributed to the presence of  $\text{PO}_4^{3-}$  and/or  $\text{HPO}_4^{2-}$  groups. The bands at  $601$  and  $560\text{ cm}^{-1}$  correspond to bending modes of the O–P–O bonds. The band at  $875\text{ cm}^{-1}$  can be attributed to the P–OH stretch vibration of  $\text{HPO}_4^{2-}$  ions.
